# Supplementary material for: Using the language of elite athletes to predict their personality and on court transgressions
Source: Research Square preprint supplement (doi:10.21203/rs.3.rs-5768784/v1), 2025-04-10
Supplement: Supplementary file 1 [file ce552215cb65d56c4c681cc7.docx]

**Using the language of elite athletes to predict their personality and on-court transgressions.**

Maor Daniel Levitin*1, Itamar Zan Ger2, Ze’ev Sovik 1, Ariel Taieb1, Lyle Ungar 3, Michael Gilead1

__________________

1) Tel-Aviv University

2) Ben-Gurion University of the Negev

3) University of Pennsylvania

**Addresses:**

Tel Aviv University, P.O.B. 39040, Tel Aviv 6997801, Israel

Ben-Gurion University of the Negev, P.O.B. 653, Beer-Sheva 8410501, Israel

University of Pennsylvania, 504 Levine, 3330 Walnut St., Philadelphia, PA 19104-6309

**Authors’ details:**

Maor Daniel Levitin* (Corresponding author), email: [maorlevitin@gmail.com](mailto:maorlevitin@gmail.com), ORCID: 0009-0006-9926-5501

Itamar Zan Ger, email: [zanger@post.bgu.ac.il](mailto:zanger@post.bgu.ac.il)

Ze’ev Sovik, email: [zeevsov1@gmail.com](mailto:zeevsov1@gmail.com)

Ariel Taieb, email: [ariel12091@gmail.com](mailto:ariel12091@gmail.com)

Lyle Ungar, email: [ungar@cis.upenn.edu](mailto:ungar@cis.upenn.edu)

Michael Gilead, email: [michaelgilead@gmail.com](mailto:michaelgilead@gmail.com)
